# Supplementary material for: Inter-brain Synchronization in the Practice of Tibetan Monastic Debate
Source: Springer Nature journal article supplement (doi:10.1007/s12671-020-01338-1), 2020-02-21
Supplement: MOESM1 [file 17730164]

**Supplementary Materials**

**Appendix S1: Transcript of sample debates**

*Note that these debates are quite hard to follow for individuals not familiar with Buddhist philosophy. However, we decided to include these debates (which are part of the EEG dataset) anyway to give an impression of a real debate. For more accessible examples of the debate argumentation, check out the course on Tibetan debate developed by Perdue (2014) or a video of a debate in English that has been developed by some of the Western monks at Sera Jey monastery:* [*https://www.youtube.com/watch?v=wkRkF_9zcgs&frags=pl%2Cwn*](https://www.youtube.com/watch?v=wkRkF_9zcgs&frags=pl%2Cwn) *.*

Example of a representative Counting debate

*C = challenger; D = defender*

C: How many outlines are there within the analysis of bodhicitta? <clap>

D: There are two. The two are: the basis of bodhicitta and the bodhicitta itself[[1]](#footnote-1).

C: The two are: the basis of bodhicitta and the bodhicitta itself that is based on that. How many outlines are there in the basis of bodhicitta? <clap>

D: There are two. The two are: the basis of body and the basis of mind.

C: There are two. The two are: the basis of body and the basis of mind. What is the basis of body? <clap>

D: The basis of body are those people who desire to attain enlightenment and the six realms. Bodhicitta can be generated through the six realms.

C: Bodhicitta can be generated through the six realms. How many outlines are there in the supported[[2]](#footnote-2)? <clap>

D: The basis of mind is the preparation of equipoise concentration or the actual equipoise concentration[[3]](#footnote-3).

C: Why is the desire mind not the mind-basis of bodhicitta? <clap>

D: Because those who have developed bodhicitta already possess the preparation of equipoise concentration. This preparation of equipoise concentration or the actual equipoise concentration mind is already more reliable than the desire mind so desire mind is not the basis of bodhicitta.

C: This preparation of equipoise concentration or the actual equipoise concentration mind is already more reliable than the desire mind so desire mind is not the basis of bodhicitta. How many outlines are there in the nature of the dependent bodhicitta? <clap>

D: The cause of bodhicitta, the nature of bodhicitta, the categories of bodhicitta, how to generate bodhicitta, the benefits of bodhicitta.

C: The cause of bodhicitta, the nature of bodhicitta, the categories of bodhicitta, how to generate bodhicitta, the benefits of bodhicitta. What are the causes of bodhicitta? <clap>

D: <has difficulty remembering> OK, OK.

C: There are four causes, four conditions, four powers, and the bodhicitta will be born through these factors. Now, if you don’t remember, let’s drop it. Now let’s go to the next one: what is the nature (of bodhicitta)? <clap>

D: Bodhicitta is a type of path that is the entrance gate of Mahayana and is induced by its cause, the aspiration seeking others’ welfare, and has similarity with its accompanier, the desire for enlightenment.

C: Bodhicitta is a type of path that is the entrance gate of Mahayana and is induced by its cause, the aspiration seeking others’ welfare, and has similarity with its accompanier, the desire for enlightenment. What are the categories of bodhicitta? <clap>

D: The two categories are: the aspiration bodhicitta and engaging bodhicitta.

C: No, no, no. There are different kinds of categories.

D: The different kinds of categories: there are 22 bodhicittas and the nature of bodhicitta, there are two.

C: Please give me exactly what’s said in the textbook. <clap>

D: There are 22 bodhicittas and the nature of bodhicitta, there are two.

C: How many categories are there within the category of bodhicitta? <clap>

D: two, three…

C: Five.

D: Five. (agrees)

C: Can you recollect those? <claps>

D: The nature of the two are…

C: The categories of example and associate…

D: There are 22.

C: What is the next one?

D: Now please give them to me.

C: The first one is the categories of the example and the associate. The second one is the categories of the boundaries…. The first one is the categories of the example and the associate. The second one is the categories of the boundaries (repeats because he does not remember the next one). The third one is the categories of the definition/nature. <clap>

D: The categories of boundaries and isn’t it the categories of both sides?

C: No, no, no. Come on! I already mentioned three. <clap>

D: Two were mentioned by me!

C: The categories of boundaries…

D: The categories of boundaries and the categories of nature/definition were mentioned by me! The categories of example and associates were mentioned by you. The rest are for you.

C: The third one is the category of the mere word. Just give up!

How many are there for the categories of the example and associates? <clap>

D: There are 22.

C: There are 22. What are the 22 according to the Maitreya’s text [*The Ornament of Clear Realization*](http://www.rigpawiki.org/index.php?title=The_Ornament_of_Clear_Realization)*?* <clap>

D: The bodhicitta like ground, like gold, like moon, like fire, like resources, like precious jewel, like sources, like ocean.

C: The whole text is bodhicitta like ground, like gold, like moon, like fire, like resources, like precious jewel, like sources, like ocean, like vajra, like mountain, like medicine, like precious teacher… From the bodhicitta like ground to the bodhicitta like clouds, there are 22.[[4]](#footnote-4) <clap>

D: The bodhicitta like ground, like gold, like moon, like fire…

C: What are the categories of boundaries? (changes topic) <clap>

D: The categories of boundaries are from the Mahayana, the merit of accumulation path to the path of enlightenment.

C: Now if you say so, what is the reference text for that? <clap>

D: The Ornament of Clear Realization?

C: No, no, no. Another text.

D: The Ornament of Sutra?

C: Yes, yes, the Ornament of Sutra. Now come on, recite that text. <clap> Yo, come on!

D: Hard to remember that.

C: Come on, come on. (recites text:) The bodhicitta according to the paths is from the aspiration bodhicitta, the pure unusual intention and ripened, and finally the elimination of obscurations. The aspiration is applied to the aspiration bodhicitta.

D: So the aspiration bodhicitta is for the path of accumulating merits and for the path of preparation.

C: Now the second one of the pure unusual intention is applied from the first ground to the seventh ground. So the third one is the ripened one is for the last three: the pure grounds. The last one is the elimination of obscurations is for enlightened bodhicitta. Now the category of definition or the nature of bodhicitta? <clap>

D: The aspiration bodhicitta and the engaging bodhicitta.

C: The aspiration bodhicitta and the engaging bodhicitta. The category of the terminological division? <clap>

D: The conventional bodhicitta and the ultimate bodhicitta.

C: The conventional bodhicitta and the ultimate bodhicitta. The cause, nature, categories, and now the way to generate bodhicitta. <clap>

D: The bodhicitta like a herd.

C: No, no, no. The ways of generating bodhicitta are the way of Jowo (Atisha) and the way of Shantideva. The way of Jowo is better.

D: Oh not that one, that is about the bodhicitta like a herd and the king.

C: No, not that category. That is about the category of example.

D: OK, OK.

C: Then what is the way of generating bodhicitta according to the way of Jowo? <clap>

D: The way of generating bodhicitta according to the Jowo is the exchanging of self and others.

C: Oh, is that the exchanging of self and others is the way of generating bodhicitta according to Jowo? <clap>

D: Oh, no, no, no. That are the seven causes and results of bodhicitta.

C: Tsa! Tsa! Tsa! Isn’t the exchanging of self and others the way of generating bodhicitta according to the Jowo?

D: No

C: Tsa! Tsa! Tsa! What are the seven causes and results of bodhicitta?

D: Knowing all sentient beings as one’s own mother, remembering their kindness, repaying their kindness, love, compassion…

**Example of a representative Logic debate**

C: Dhih! Bodhicitta is a type of path that is the entrance gate of Mahayana and is induced by its cause, the aspiration seeking others’ welfare, and has similarity with its accompanier, the desire for enlightenment[[5]](#footnote-5). Is this the definition of bodhicitta? <clap>
D: Yes.
C: So this definition in lama Jetsun Chokyi Gyaltsen's first chapter of the *General Meaning of Paramita*, and the *Seventy Meanings of Paramita* text and the definition in the *General Meaning of Madyamaka* texts: do those pervade or not?[[6]](#footnote-6) <clap>
D: Yes.
C: If yes, in the *General Meaning of Madyamaka*, the special cognition and is induced by its cause, the aspiration seeking others’ welfare, and has similarity with its accompanier, the desire for enlightenment—this is the definition of bodhicitta, then if there is the special cognition that is induced by its cause, the aspiration seeking others’ welfare, and has similarity with its accompanier, the desire for enlightenment then does it follow that if there is necessarily bodhicitta? <clap>
D: Yes.
C: If yes, what is the measurement of special cognition? <clap>
The special cognition that is induced by its cause, the aspiration seeking others’ welfare, and has similarity with its accompanier, the desire for enlightenment, this is the definition of bodhicitta. Then what is the measurement of special cognition? <clap>
D: The purpose of mentioning the special cognition is to distinguish the bodhicitta from the bodhicitta like the peel of a sugar cane.[[7]](#footnote-7)
C: If so, the bodhicitta like the peel of a sugar cane is the wish to attain Buddhahood for the benefit of all sentient beings, but not the special cognition? <clap>
D: Yes.
C: Isn't it true that the difference between the special cognition to attain Buddhahood for the benefit of all sentient beings and the wish to attain Buddhahood for the benefit of all sentient beings is that one costs effort and the other is effortless? <clap>
D: Yes.
C: So the effortless bodhicitta refers to the special cognition and before that we call it the effortful bodhicitta like the peel of the sugar cane? <clap>
D: Yes.

C: Both of them arise from their cause, the great compassion? <clap>

D: Yes.

C: if so, if something is Mahayana bodhicitta, is it necessary to arise from the great compassion? <clap>

D: Yes.

C: if so, if something is Mahayana bodhicitta, is it necessary to arise from the great compassion? <clap>

D: Yes.

C: So, you say that great compassion is the cause of the bodhicitta? So is the great compassion the substantial cause of bodhicitta?[[8]](#footnote-8) <clap>

D: Yes.

C: If so, is the great compassion *always* the substantial cause of bodhicitta?[[9]](#footnote-9) <clap>

D: Yes.

C: Isn’t it the case that the substantial cause is the cause that causes the nature of the result and the cooperative cause is what causes the features of the result? <clap>

D: Yes.

C: So doesn’t it mean that the causes that cause the nature of the result is the cause transforming into the result? <clap>

D: No.

C: Doesn’t it mean that the causes that cause the nature of the result is the cause transforming into the result? <clap>

D: No.

C: Then what is the meaning of causes that cause the nature of the result? <clap>

D: It means whenever someone generates bodhicitta, it must depend upon the great compassion.

C: What is the meaning of causes that cause the nature of the result and causes the feature of the result? <clap>

D: It means whenever someone generates bodhicitta, it must depend upon the great compassion.[[10]](#footnote-10)

C: Aren’t you mentioning that the meaning of causes that cause the result is that whenever someone generates bodhicitta, it [[11]](#footnote-11)depends upon that cause? <clap>

D: No.

C: Tsah![[12]](#footnote-12) Aren’t you mentioning that the meaning of causes that cause the result is that whenever someone generates bodhicitta, it depends upon that cause? <clap>

D: No.

C: Tsah!

Then what is the meaning of causes that cause the result? <clap>

D: Whenever someone generates bodhicitta, it must depend upon that main cause.

C: If so, *khor sum* (you are confused). Is it necessary that the cause of bodhicitta is the substantial cause? <clap>

D: No.

C: Is it possible to generate bodhicitta without depending upon the main cause? <clap>

D: No.

C: Tsah! Is it the case that to generate bodhicitta, one should depend upon the main cause? <clap>

D: Yes.

C: Tsah! Is it necessary that for it to be a cause it should be the substantial cause because to generate bodhicitta one must depend on the main cause? <clap>

D: No.

C: Is it possible to generate bodhicitta without depending on main causes? <clap>

D: Without depending on the main causes it is impossible to generate bodhicitta.

C: Without depending on the main causes it is possible to generate bodhicitta. <clap>

D: No.

C: Tsah! Tsah! To generate bodhicitta must depend upon the main causes? <clap>

D: Yes.

C: Tsah! Is it necessary that for it (the bodhicitta) to be a cause of bodhicitta, it should be the substantial cause because it must depend on the main cause? <clap>

D: No.

C: Tsah! Isn’t the meaning of causes that cause the nature of the result is that to arise it must depend on the main cause? <clap>

D: Yes.

C: But it does not pervade. If the object is the cause of bodhicitta, it doesn’t have to be the substantial cause of bodhicitta. Isn’t it the definition of the substantial cause that it is supposed to be a cause that produces the actual entity of the result rather than its characteristics/other features? <clap>

D: Yes it is the definition.

C: Tsah! It’s doesn’t pervade. If bodhicitta most strongly relies on that cause, isn’t that cause supposed to be the substantial cause? <clap>

D: Yes.

C: Tsah! Bodhicitta has so many causes (contributing causes) on which it relies so strongly. Are those also the substantial cause? <clap>

D: Yes.[[13]](#footnote-13)

C: So is the contributing cause also a substantial cause? <clap>

D: No.

C: Tsah! So it has to be its substantial cause because it relies strongly on that contributing cause? <clap>

D: The compassion doesn’t strongly rely on the contributing cause.

C: {citing a text} “Any cause that has the potential necessary to produce that result, nothing can stop it from producing that result.”

D: No.

C: Is it possible for a result to come into being with insufficient causes?[[14]](#footnote-14) <clap>

D: There is no way that any result can come into being with insufficient causes.

C: All results depend on its primary contributing/cooperative cause and primary substantial cause. <clap>

D: There is no such thing as a primary contributing cause.

C: If it is a contributing cause, does it pervade that it’s not the primary cause? <clap>

D: Yes.

C: Aren’t there two ways to differentiate the causes as primary and common? <clap>

D: Yes.

C: Are primary and common two different ways in which a particular result relies on its object? <clap>

D: Of course there are two ways like the seed and the fertilizer.

C: Is the compassion’s cause compassion’s substantial cause? <clap>

D: It can be anything—compassion has so many causes.

C: Is the compassion’s cause a substantial cause of compassion?[[15]](#footnote-15) <clap>

D: No.

C: So compassion’s cause is its substantial cause because it most strongly relies on it? <clap>

D: No.[[16]](#footnote-16)

C: So doesn’t compassion rely on its cause? <clap>

D: No.

C: Tsah! So the empowering condition[[17]](#footnote-17) is the primary cause? <clap>

D: No, it’s not the primary cause.

C: So compassion relies on its primary cause which is its empowering condition? <clap>

D: No, the empowering condition is not the primary cause.

C: So isn’t the empowering condition a cause that is the direct cause for producing the compassion? <clap>

D: Yes.

C: Isn’t it the empowering condition? <clap>

D: Yes.

C: Isn’t the empowering condition something that is the direct cause for producing the result? <clap>

D: Yes.

C: Isn’t it the definition of empowering condition? <clap>

D: Yes.

C: Yongdzin Jampa Gyatso in *Collection of Logic* says “the direct cause of the eye consciousness perceiving blue colour is the definition of the empowering condition”. <clap>

D: It does not pervade (I do not agree).

C: Isn’t it the definition of empowering condition? <clap>

D: It’s not the definition of empowering condition but it’s the definition of the *main* empowering condition.

C: Khedup Rinpoche’s commentary on *The Seven Treatises of Pramana* says “A cause that directly produces its result is the definition of the empowering condition.” Isn’t this the definition of the empowering condition? <clap>

D: Yes.

C: Isn’t there any definition for empowering condition in accordance with the Svatantrika Madyamika school? <clap>

D: Yes, there is a definition.

C: If there is such a definition, then recite it. <clap>

D: …

C: Have you already eaten it?

D: Yes.

C: So isn’t your statement that something that causes the nature of the result means that the result is dependent on that? <clap>

D: Yes.

C: But this definition does not follow as all causes of the result will become the substantial cause. You are confused (*khor sum*). You are not correct.

[[18]](#footnote-18) So for the bodhicitta, is it necessary that it arises from its main cause, great compassion? <clap>

D: Yes.

C: Is it impossible to prove that whenever one possesses the great compassion, one also possesses bodhicitta? <clap>

D: Yes.

C: Is it impossible to prove that whenever one possesses the great compassion, one also possesses bodhicitta? <clap>

D: Yes.

C: In the text it says that according to some scholars a person on the uninterrupted path of seeing does not possess bodhicitta. How does the text oppose this position? <clap>

D: That is correct.

C: The text retorts that a person on the uninterrupted path of seeing does possess bodhicitta as the final stage of the path of seeing possesses bodhicitta because the beginning of omniscience contains bodhicitta, which directly arises from great compassion in the final stage before omniscience. So due to the reason of the possessing the great compassion, it possesses the bodhicitta. <clap>

D: It cannot prove that.

C: In the text the great compassion is the main seed of bodhicitta. Don’t these words prove that due possessing great compassion then it is necessary to possess the bodhicitta? <clap>

D: This text means that in general having great compassion does not imply having bodhicitta, but for someone on the uninterrupted path of seeing, then it is true that having great compassion implies having bodhicitta.

C: Do you say that the person on the uninterrupted path of seeing possesses bodhicitta because of he or she is a bodhisattva? <clap>

D: No.

C: Why does the person on the uninterrupted path of seeing possess bodhicitta? Why does the person on the uninterrupted path of seeing possess bodhicitta? <clap>

D: The person on the uninterrupted path of seeing possesses bodhicitta as this person has as its object of focus all sentient beings, just like the great compassion and if the person on the uninterrupted path of seeing does not possess bodhicitta then also the final stage of the uninterrupted path of seeing does not possess bodhicitta. If so, then the final stage of the uninterrupted path of seeing also does not possess great compassion. Then the beginning of omniscience also does not possess bodhicitta as it has to arise directly from the great compassion in the final stage of the uninterrupted path of seeing.

C: So it is necessary that when someone possesses great compassion, one also possesses bodhicitta and when someone does not possess great compassion, one does not possess bodhicitta? <clap>

D: No.

C: You said that on the final stages of the uninterrupted path of seeing, if one possesses great compassion, one must possess bodhicitta. <clap>

D: On the final stages of the uninterrupted path of seeing that is the case.

C: Then how can you prove that? How can you prove that the person on the uninterrupted path of seeing possess bodhicitta? Is it because he or she is a bodhisattva? <clap>

D: No, no, no.

C: Then what is that? <clap>

D: The person on the uninterrupted path of seeing possesses great compassion, which is the main seed of bodhicitta.

C: Why possess the bodhicitta? <clap>

D: The beginning of omniscience possesses the bodhicitta, which arises from the great compassion from the final stage of the path of seeing. Come on, come on!

C: You said that due to the reason of possessing the great compassion, you possess bodhicitta for a person on the uninterrupted path of seeing. Due to this reason, it only proves that the person in meditative equipoise possesses great compassion, not the bodhicitta. It only proves that the person in meditative equipoise possesses great compassion, not the bodhicitta <clap>

D: It can prove both.

C: How can it prove the possession of bodhicitta? <clap>

D: If it possesses great compassion then it is possible that it is a person who has the mind for attaining enlightenment for the sake of all sentient beings, in that case a person can possess the bodhicitta. That person can possess both the great compassion and the bodhicitta.

C: In the text of Engaging the Bodhisattva Deeds proves that a person on the final stages of the uninterruptable path of seeing possesses both great compassion and bodhicitta.

**Appendix S2: Overview of monastic training**

Monastic training has a duration of approximately 25 years. It starts with three years of introduction to philosophy and reasoning, followed by the paramita level (7 years), consisting of a study of the Perfection of Wisdom texts. This is followed by the 4-year Madhyamika level in which the monks study the philosophical texts of the Madhyamika school which seeks to cultivate an appreciation of the “middle way”, avoiding extremes in thinking. After Madhyamika, monks engage in an in-depth study of the monastic rules (Vinaya). In contrast to the previous years, here the emphasis lies more on memorization and less on complex philosophical ideas. Deep philosophical thinking takes center stage again in the Abhidharma years, which focus on metaphysics. Running through all the years of monastic training is the study of *pramana* (“valid cognition”), which provides the tools for how to reason and applies those tools to Buddhist epistemology, and which is studied for one month every year.

**Appendix S3: More details about the content of monastic debate**

Debate has a distinct form of dialogue. The challenger posits questions and declarative statements to which the defender must respond. The challenger can ask questions (such as “give the definition of great compassion”), or make propositions consisting of a subject, a predicate, and a reason. An example statement could be “sound (subject) is impermanent (predicate) because of being a product (reason).” To such a statement the defender can make one of the following responses: (1) I agree, (2) I disagree, or (3) please explain why this is true or (4) it does not pervade (Perdue, 2014). “I agree” signifies that the defender agrees that the predicate belongs to the subject (in this case, that the sound is impermanent). “I disagree” indicates that the defender does not agree that the predicate belongs to the subject. “Explain why this is true” indicates that the defender does not agree with the reason being given, and “it does not pervade” indicates that the reason given does not apply to the subject. An example of an incorrect pervasion is when you argue that something must be a sound because it is impermanent: not all things that are impermanent are sounds, so the pervasion is too wide (Perdue, 1992; p. 62). Each statement or question is punctuated by a clapping movement that signals the end of the statement. The defender then needs to respond as quickly as possible. If he does not respond quickly enough, then the challenger may start to goad him provocatively by saying “come on, come on” (Liberman, 2015). Debates do not have a clear moment of conclusion, although punctuating moments occur when the challenger has detected inconsistencies in the reasoning of the defender, at which points he utters a vivid “tsha!” The aim of the defender is to prevent moments where his opponent can proclaim “tsha,” and to ensure that he can recall all the definitions requested of him. Two examples of debates that form part of our EEG dataset are given in the previous appendices.

**Appendix S4: Debate rating form**

**Debate Rating Form**

Rating Scale: Please rate the Defender, the Challenger, and the Overall Debate using this 11-point scale.

| **Worst Debate/Debater you have ever seen** |  |  |  |  |  |  |  |  |  | **Best Debate/Debater you have ever seen** |
| --- | --- | --- | --- | --- | --- | --- | --- | --- | --- | --- |
| 0 | 1 | 2 | 3 | 4 | 5 | 6 | 7 | 8 | 9 | 10 |

| **Fill in the Blank or Circle the correct answer** | | |
| --- | --- | --- |
| **Today’s Date** |  |  |
| **Core Member Name** |  |  |
| **Computer Coder** | Yes | No |
| **Session** | Beginner Debate | Experienced Debate |
|  |  |  |
| **Counting Debate 1** | **Rating 0-10** |  |
| **Defender Rating** |  |  |
| **Challenger Rating** |  |  |
| **Overall Ratings** |  |  |
|  |  |  |
| **Logic Debate 1** | **Rating 0-10** |  |
| **Defender Rating** |  |  |
| **Challenger Rating** |  |  |
| **Overall Ratings** |  |  |
|  |  |  |
| **Counting Debate 2** | **Rating 0-10** |  |
| **Defender Rating** |  |  |
| **Challenger Rating** |  |  |
| **Overall Ratings** |  |  |
|  |  |  |
| **Logic Debate 2** | **Rating 0-10** |  |
| **Defender Rating** |  |  |
| **Challenger Rating** |  |  |
| **Overall Ratings** |  |  |
|  |  |  |

**Appendix S5: Supplementary figures**


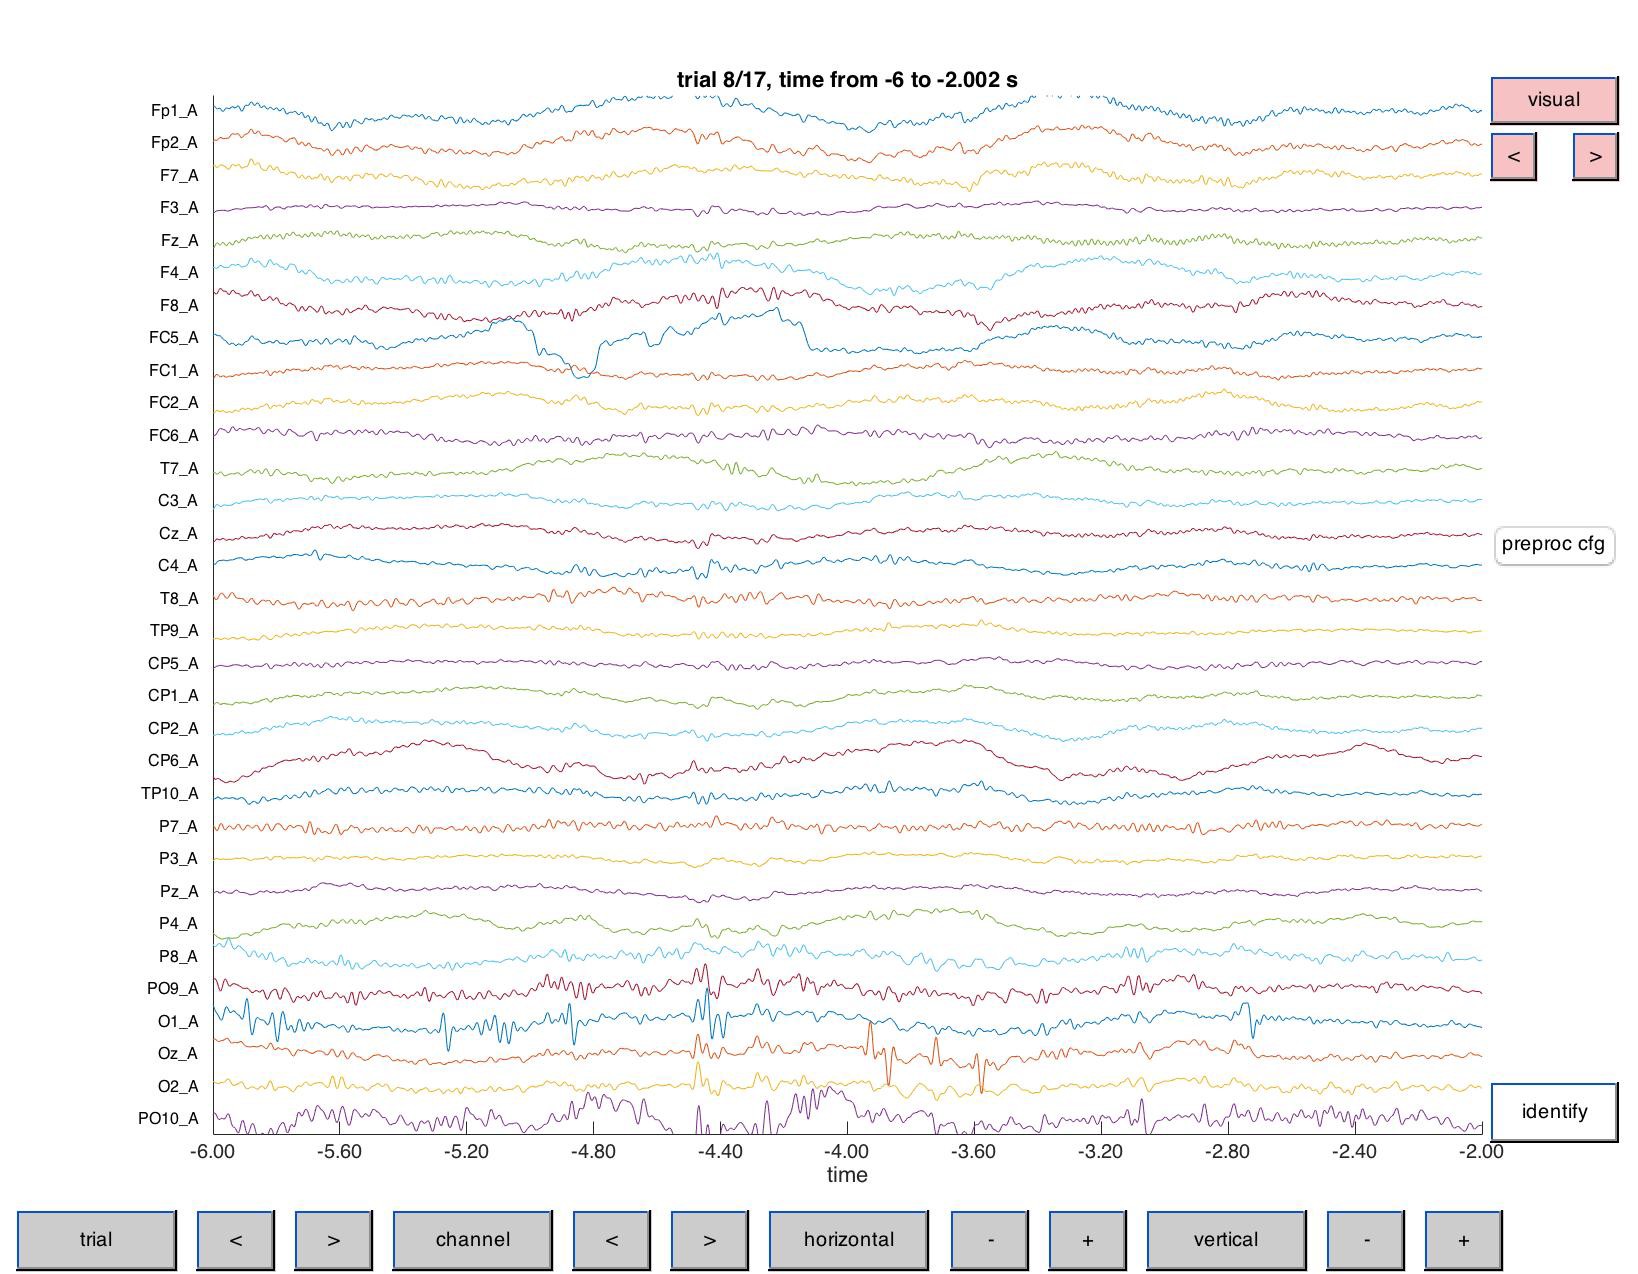


*Supplementary Figure 1*. Sample EEG trace after cleaning up with ICA (screenshot from the Fieldtrip toolbox).

1. The nature of bodhicitta itself that is based on the support [↑](#footnote-ref-1)
2. The nature of bodhicitta itself that is based on the support [↑](#footnote-ref-2)
3. The D thinks that he has to answer the question about the basis of mind, which is the answer to a different question. [↑](#footnote-ref-3)
4. The whole text is bodhicitta like ground, like gold, like moon, like fire, like resources, like precious jewel, like sources, like ocean, like vajra, like mountain, like medicine, like precious teacher, like precious talisman, like sun, like song, like king, like treasure chest, like highway, like animals we can ride, like hot springs, like guitar, like river, like clouds. [↑](#footnote-ref-4)
5. Recites the definition of bodhicitta. [↑](#footnote-ref-5)
6. In other words: are those all valid or not. [↑](#footnote-ref-6)
7. The latter bodhicitta requires effort; the real bodhicitta, the former, is effortless. [↑](#footnote-ref-7)
8. Or is it a subsidiary cause (substantial cause means it’s the progenitor; subsidiary cause is a contributing factor) [↑](#footnote-ref-8)
9. In other words, does it pervade? [↑](#footnote-ref-9)
10. They repeat it because they are a bit unclear. [↑](#footnote-ref-10)
11. Note he leaves out the word “must” [↑](#footnote-ref-11)
12. The definition misses the “must” [↑](#footnote-ref-12)
13. Here the defender has a slip of mind and accidentally confuses contributing and substantial causes. [↑](#footnote-ref-13)
14. Here the challenger also has a funny slip of mouth so both laugh. [↑](#footnote-ref-14)
15. This is a more general way of phrasing. [↑](#footnote-ref-15)
16. Defender is only negating the first half of the sentence [↑](#footnote-ref-16)
17. defined as the cause that plays the most important role of bringing forth the result. [↑](#footnote-ref-17)
18. Changing the topic [↑](#footnote-ref-18)
